# Supplementary material
Source: PubMed Central journal article supplement (PMC2781565)
Supplement: supp_M109.044081_jbc.M109.044081-1.pdf [file supp_M109.044081_jbc.M109.044081-1.pdf]

## SUPPLEMENTAL DATA

### SUPPLEMENTAL TABLE 1

#### Summary of the effects of Rubisco small-subunit substitutions and the relationships of the substituted residues to the large subunit

The mutant substitutions are grouped according to their locations near the carboxyl-terminal bottom, middle, or amino-terminal top of large-subunit  $\alpha$ -helix 8.

| Substitution                                     | Growth at 35 °C <sup>a</sup> | Effect on catalysis <sup>b</sup>                               | $\alpha$ C - C2-CABP distance (Å) | Large-subunit interactions <sup>c</sup> |
|--------------------------------------------------|------------------------------|----------------------------------------------------------------|-----------------------------------|-----------------------------------------|
| Bottom region of large-subunit $\alpha$ -helix 8 |                              |                                                                |                                   |                                         |
| Y32A                                             | inhibited                    | $\downarrow\Omega, \downarrow V_c, \downarrow K_o$             | 34.2                              | R431, N432                              |
| Middle region of large-subunit $\alpha$ -helix 8 |                              |                                                                |                                   |                                         |
| S16A                                             | normal                       | minor                                                          | 27.1                              | E234, R421, E425                        |
| L18A                                             | inhibited                    | not determined                                                 | 27.6                              | E425, A426, Q429, W451                  |
| P19A                                             | normal                       | minor                                                          | 31.2                              | W451                                    |
| Top region of large-subunit $\alpha$ -helix 8    |                              |                                                                |                                   |                                         |
| E43A                                             | inhibited                    | $\downarrow\Omega, \downarrow V_c, \uparrow K_c, \uparrow K_o$ | 28.5                              | R187                                    |
| W73A                                             | inhibited                    | $\downarrow V_c, \uparrow K_c, \uparrow K_o$                   | 27.1                              | Y190                                    |
| L78A                                             | inhibited                    | $\downarrow V_c, \uparrow K_c, \uparrow K_o$                   | 22.7                              | F13, W70, P410, G412                    |
| P79A                                             | normal                       | $\downarrow V_c$                                               | 23.9                              | W70                                     |
| F81A                                             | inhibited                    | $\downarrow V_c, \uparrow K_c, \uparrow K_o$                   | 24.6                              | A11, G12, W70, G73, L74                 |
| E92A                                             | normal                       | minor                                                          | 33.3                              | none                                    |

<sup>a</sup> Summary of results from Fig. 2.

<sup>b</sup> Summary of results from Tables 1 and 2.

<sup>c</sup> Except for a Glu-43 to Arg-187 salt bridge, all interactions are by van der Waals contact.

## SUPPLEMENTAL TABLE 2

### Identities of large-subunit residues from representative species that are in contact with conserved small-subunit residues

The corresponding residues in the L2 Rubisco of *Rhodospirillum rubrum* (RR), which lacks small subunits, is included for comparison.

| Species <sup>a</sup> | Large-subunit residues |    |    |    |    |    |     |     |     |     |     |     |     |     |     |     |     |     |
|----------------------|------------------------|----|----|----|----|----|-----|-----|-----|-----|-----|-----|-----|-----|-----|-----|-----|-----|
|                      | 11                     | 12 | 13 | 70 | 73 | 74 | 187 | 190 | 234 | 410 | 412 | 421 | 425 | 426 | 429 | 431 | 432 | 451 |
| CR                   | A                      | G  | F  | W  | G  | L  | R   | Y   | E   | P   | G   | R   | E   | A   | Q   | R   | N   | W   |
| SO                   | V                      | G  | F  | W  | G  | L  | R   | Y   | E   | P   | G   | R   | E   | A   | Q   | R   | N   | W   |
| NT                   | V                      | G  | F  | W  | G  | L  | R   | Y   | E   | P   | G   | R   | E   | A   | K   | R   | N   | W   |
| AT                   | V                      | G  | F  | W  | G  | L  | R   | Y   | E   | P   | G   | R   | E   | A   | Q   | R   | N   | W   |
| HA                   | V                      | G  | F  | W  | G  | L  | R   | Y   | E   | P   | G   | R   | E   | A   | Q   | R   | N   | W   |
| PS                   | V                      | G  | F  | W  | G  | L  | R   | Y   | E   | P   | G   | R   | E   | A   | Q   | R   | N   | W   |
| ZM                   | V                      | G  | F  | W  | G  | L  | R   | Y   | E   | P   | G   | R   | E   | A   | Q   | R   | N   | W   |
| MP                   | V                      | G  | F  | W  | G  | L  | R   | Y   | E   | P   | G   | R   | E   | A   | Q   | R   | N   | W   |
| SY                   | A                      | G  | Y  | W  | L  | L  | R   | Y   | E   | P   | G   | R   | E   | A   | Q   | R   | N   | W   |
| AB                   | S                      | G  | Y  | W  | L  | L  | R   | Y   | E   | P   | G   | R   | E   | A   | Q   | R   | N   | W   |
| AE                   | K                      | R  | Y  | W  | R  | L  | R   | Y   | E   | P   | G   | R   | E   | A   | L   | R   | N   | A   |
| GP                   | S                      | R  | Y  | W  | L  | L  | R   | Y   | E   | P   | G   | R   | E   | A   | L   | R   | N   | T   |
| RR                   | -                      | -  | -  | C  | T  | D  | E   | H   | E   | I   | G   | R   | Q   | A   | D   | V   | P   | -   |

<sup>a</sup> Species abbreviations are: CR, *Chlamydomonas reinhardtii*; SO, *Spinacea oleracea*; NT, *Nicotiana tabacum*; AT, *Arabidopsis thaliana*; HA, *Helianthus annuus*; PS, *Pisum sativum*; ZM, *Zea mays*; MP, *Marchantia polymorpha*; SY, *Synechococcus*; AB, *Anabaena*; AE, *Alcaligenes eutrophus*; GP, *Galdieria partita*; RR, *Rhodospirillum rubrum*.
